# Supplementary material
Source: Springer Nature journal article supplement (https://www.springermedizin.de/resource/supplementary/12879_2008_828_MOESM1_ESM.pdf/9449878)

Additional file 1: Summary of specimen processing and testing

□ Action      □ Result      EM = Electron Microscopy

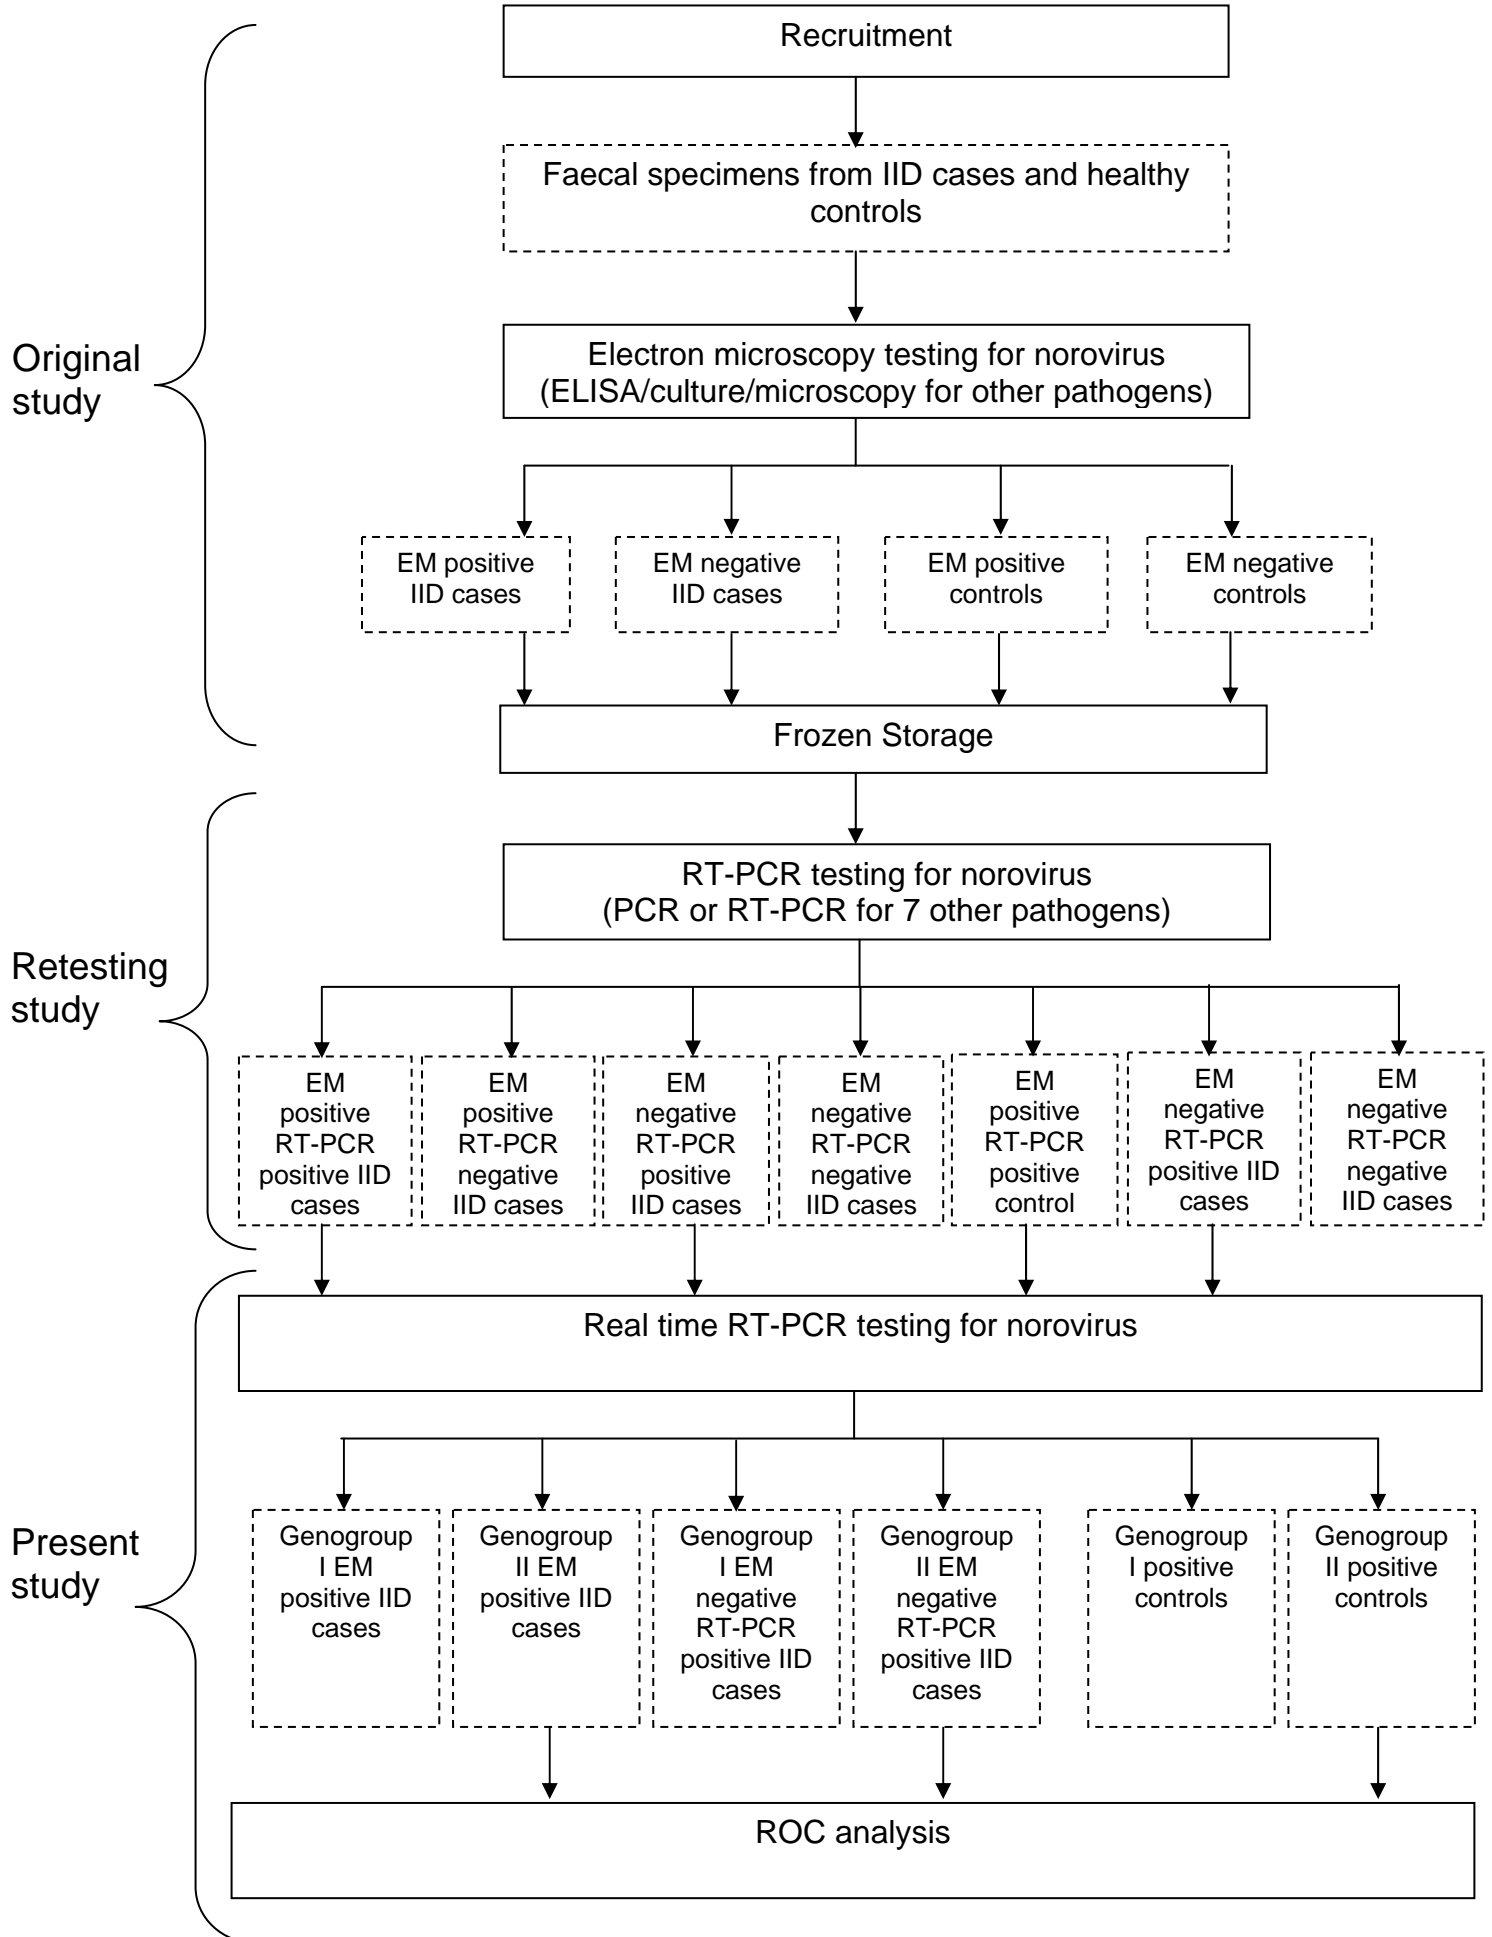

Supplement: MOESM1 [file 9449878]
